# Supplementary material
Source: HighWire-hosted journal article supplement (https://www.genetics.org/content/suppl/2010/07/01/genetics.110.113977)
Supplement: FigureS6.pdf [file FigureS6.pdf]

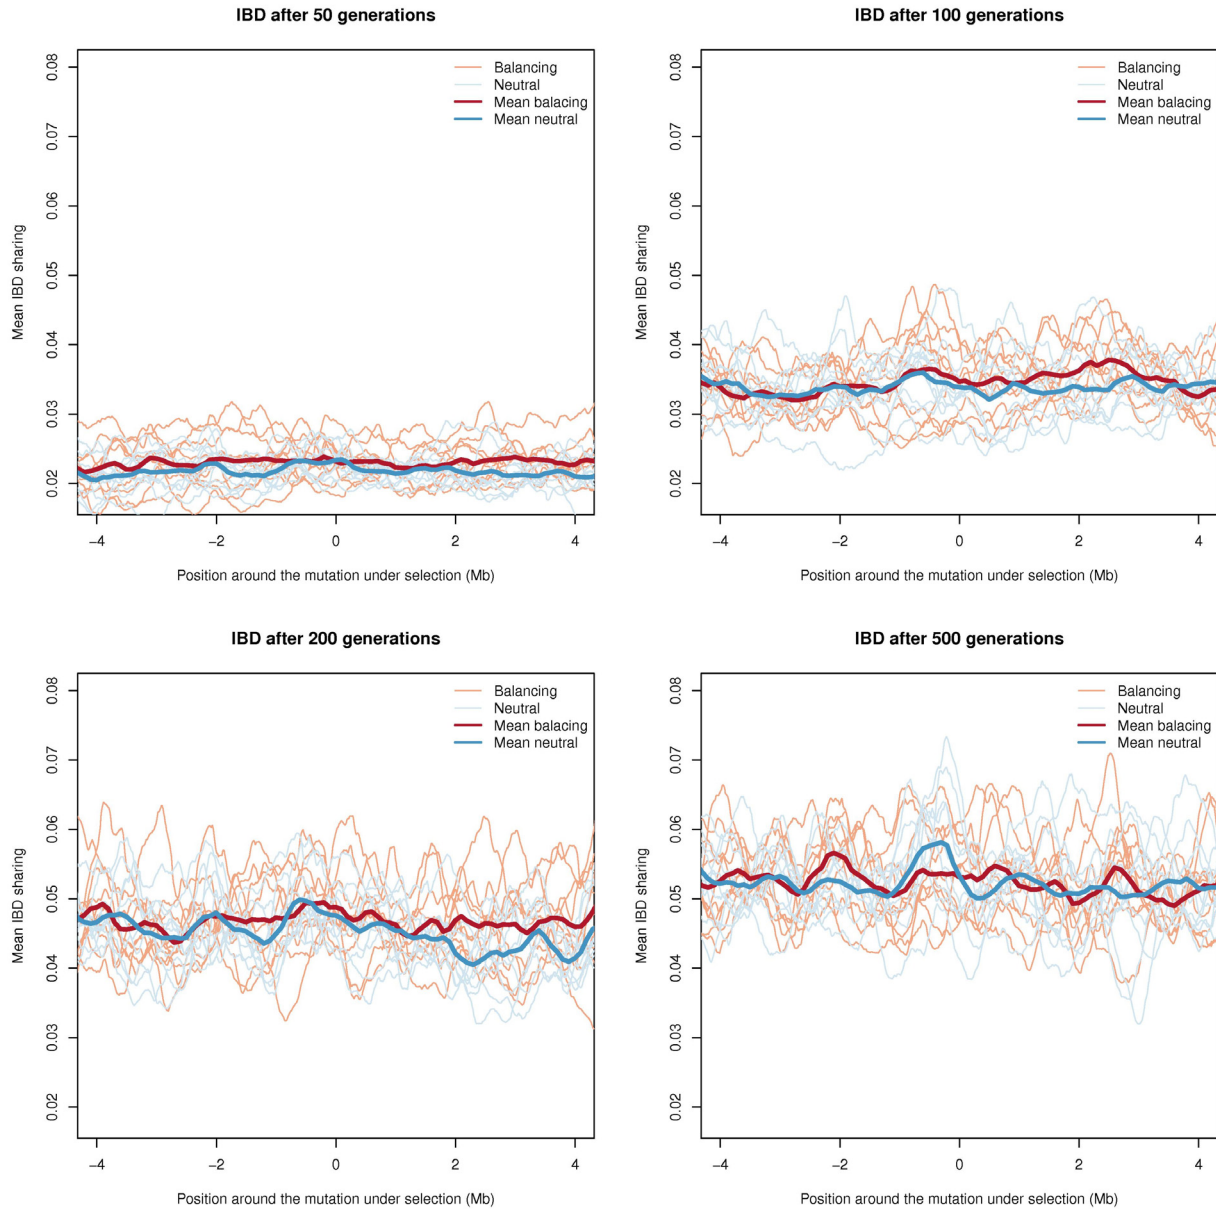

FIGURE S6.—Simulation of balancing selection. Shown is the mean posterior probability of IBD sharing after 50, 100, 200, and 500 generations in simulations with strong balancing selection ( $s=0.01, h=10$ ) on an existing allele of frequency 0.1. Ten simulations were performed, each of a 10Mb region. Only the region around the mutation is shown. For comparison the mean posterior probability of IBD sharing for simulations without selection are also shown. The neutral simulations were performed on the same haplotypes that were used as a starting point for the simulations with selection. The thin lines show each simulation while the thick lines shows the mean of the 10 simulations. The red lines are the simulations with selection and the blue lines the simulations without selection.
